# Supplementary material for: Nucleation-mediated synthesis and enhanced catalytic properties of Au–Pd bimetallic tripods and bipyramids with twinned structures and high-energy facets
Source: Royal Society of Chemistry journal article supplement (doi:10.1039/c5nr08154h), 2015-12-28
Supplement: c5nr08154h1.pdf [file c5nr08154h1.pdf]

Electronic Supplementary Information

**Nucleation-Mediated Synthesis and Enhanced Catalytic  
Properties of Au-Pd Bimetallic Tripods and Bipyramids with  
Twinned Structures and High-Energy Facets**

Lei Zhang,<sup>\*a</sup> Xue Wang,<sup>b</sup> Qiaoli Chen<sup>b</sup> and Zhiyuan Jiang<sup>\*b</sup>

*<sup>a</sup>Key Laboratory for Green Chemical Technology of Ministry of Education, School of  
Chemical Engineering and Technology, Tianjin University, Collaborative Innovation Center  
of Chemical Science and Engineering, Tianjin 300072, China*

*E-mail: zhangl@tju.edu.cn*

*<sup>b</sup>State Key Laboratory for Physical Chemistry of Solid Surfaces & Department of Chemistry,  
College of Chemistry and Chemical Engineering, Xiamen University, Xiamen 361005, China*

*E-mail: zyjiang@xmu.edu.cn*

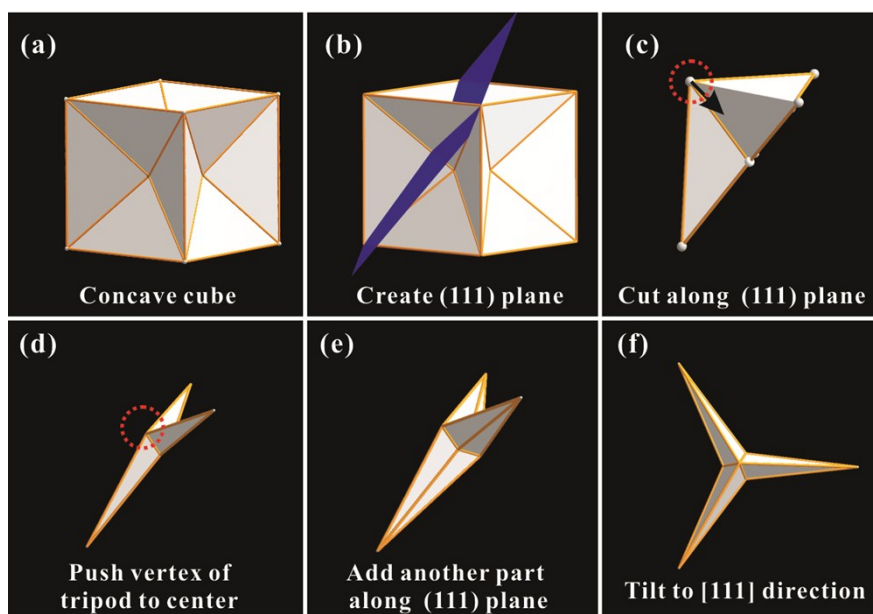

**Fig. S1** The models showing that the tripods exposed by  $\{hkk\}$  facets are evolved from a concave cubic structure.

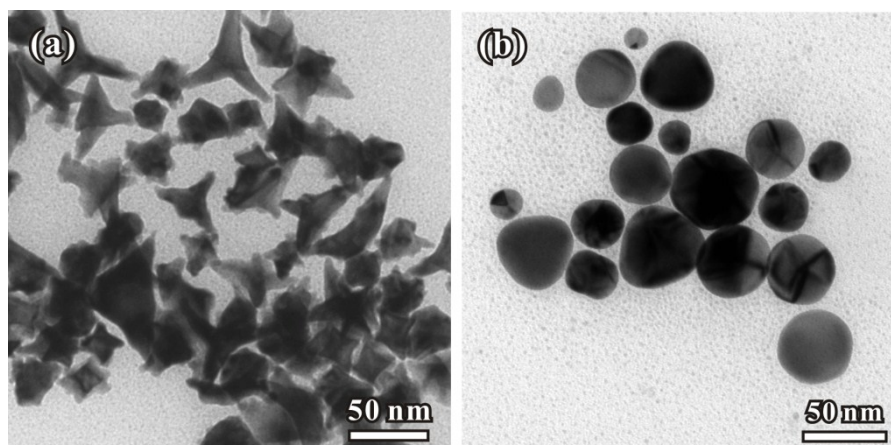

**Fig. S2** (a) TEM image of Au-Pd NCs that were prepared using the standard procedure, expect for the introduced  $\text{H}_2\text{PdCl}_4$  increased to 1 mL. (b) TEM image of Au NCs that were prepared using the standard procedure, expect for the absence of  $\text{H}_2\text{PdCl}_4$ .

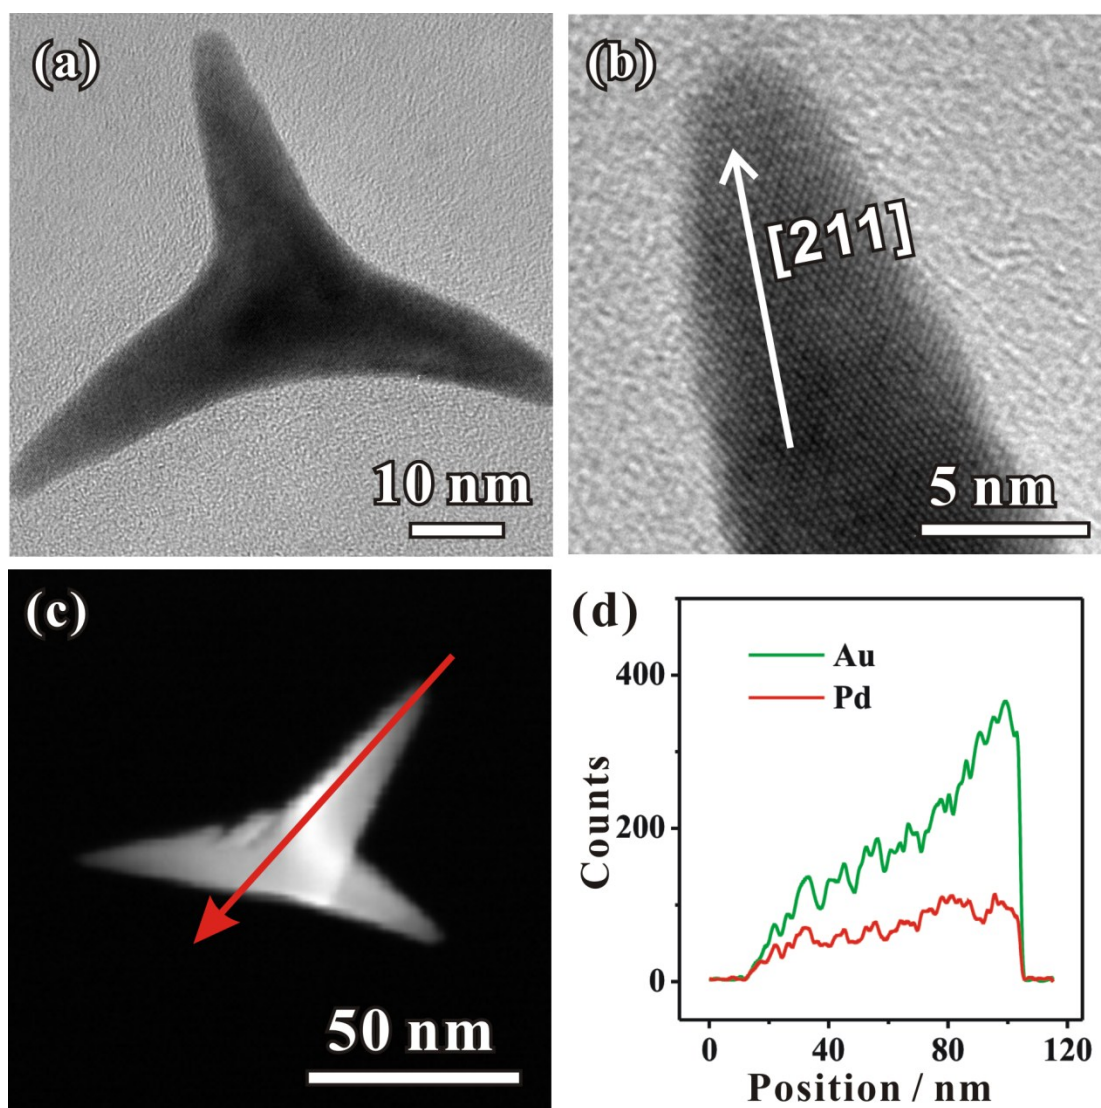

**Fig. S3** (a, b) The HR-TEM images of one individual tripod viewing along  $\langle 111 \rangle$  direction. (c, d) The cross-sectional compositional line-scanning profile of the Au-Pd tripods.

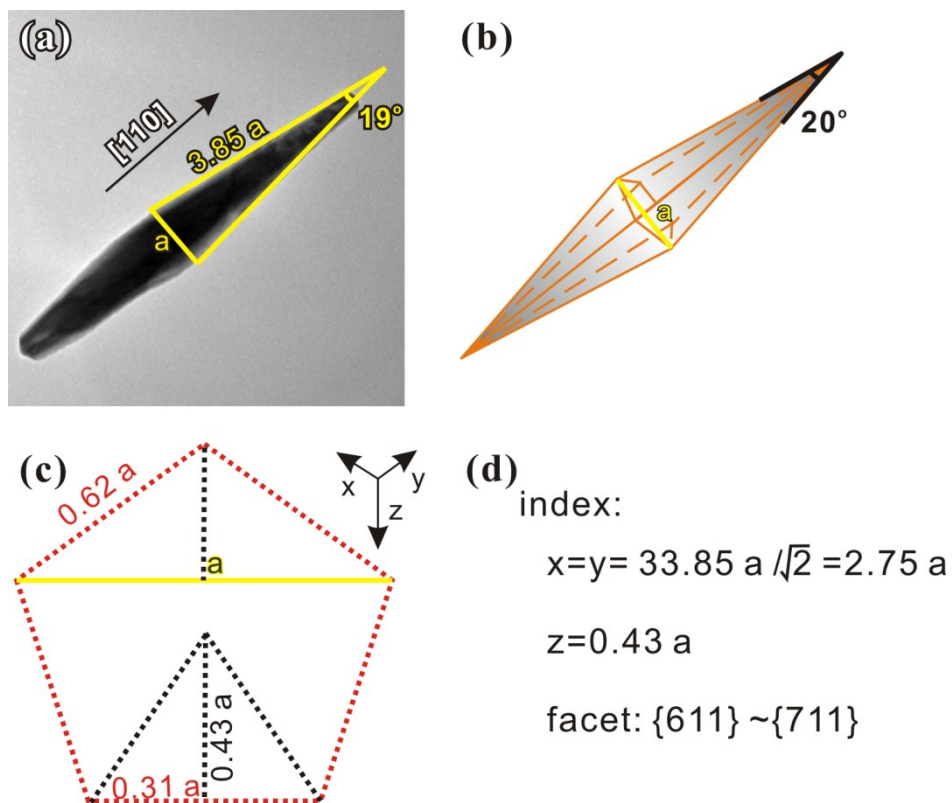

**Fig. S4** (a, b) The TEM image of one individual bipyramid and corresponding schematic model. (c, d) The calculation of the geometric parameters of bipyramid conclude that the surfaces of bipyramids range from  $\{611\}$  to  $\{711\}$  facets.

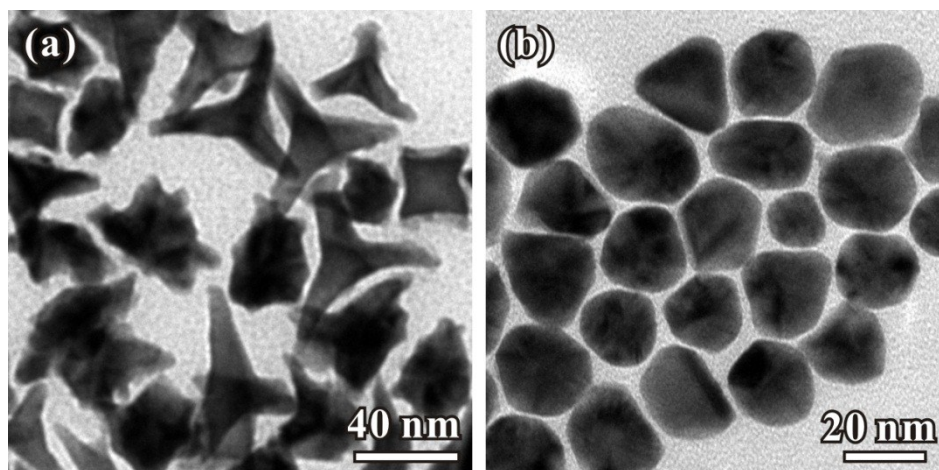

**Fig. S5** (a) TEM image of Au-Pd bimetallic nanocrystals that were prepared using the standard procedure, expect in the absence of  $\text{Cu}(\text{CH}_3\text{COO})_2$ . (b) TEM image of spherical Au-Pd nanocrystals that were prepared using the standard procedure, expect adding 2 mL of  $\text{Cu}(\text{CH}_3\text{COO})_2$  into the solution.
